# Supplementary material
Source: PubMed Central journal article supplement (PMC8638546)
Supplement: NIHMS1633651-supplement-2.pdf [file NIHMS1633651-supplement-2.pdf]

# Supl. Figures

A

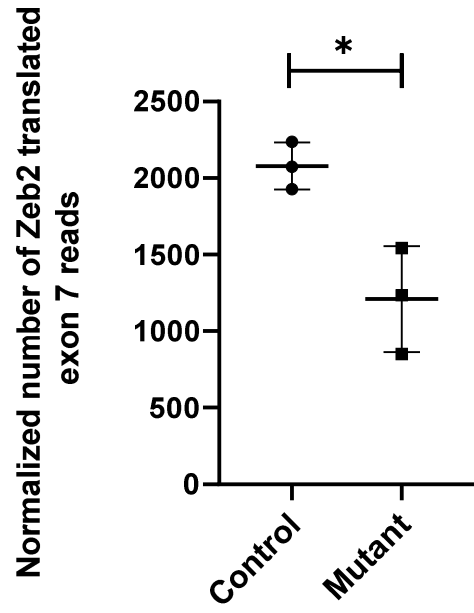

B

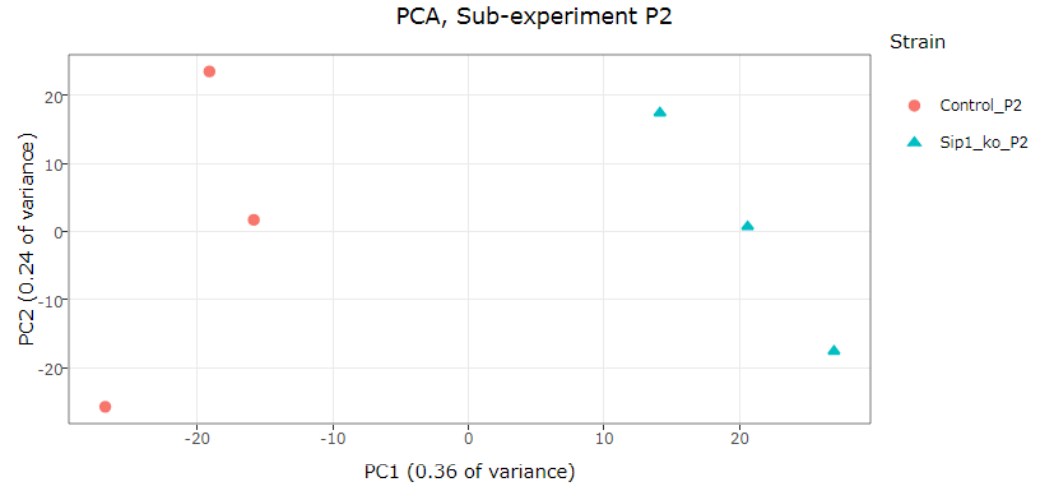

A

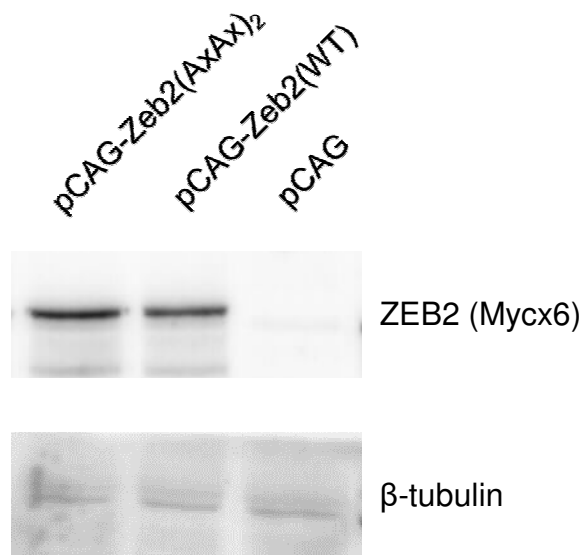

B

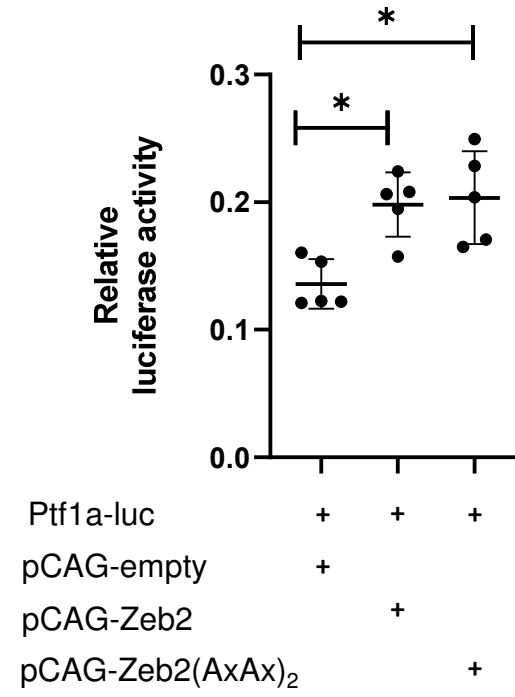

**Table S1 – primers used in this study**

| Reaction          | Primer sequences          |
|-------------------|---------------------------|
| Cre forward       | ATGCTTCTGTCCGTTTGCCG      |
| Cre reverse       | CCTGTTTTGCACG TTCACCG     |
| Hes1 qPCR forward | GCAGACATTCTGGAAATGACTGTGA |
| Hes1 qPCR reverse | GAGTGCGCACCTCGGTGTTA      |
| Id1 qPCR forward  | CCAGTGGGTAGAGGGTTTGA      |
| Id1 qPCR reverse  | AGAAATCCGAGAAGCACGAA      |
| Id2 qPCR forward  | ACCCGATGAGTCTGCTCTAC      |
| Id2 qPCR reverse  | CTGGTTCTGTCCAGGTCTCT      |
| Id3 qPCR forward  | AGGTGTCTCTTTTCCTCCCT      |
| Id3 qPCR reverse  | ATGTCGTCCAAGAGGCTAAG      |
| Id4 qPCR forward  | G TTCACGAGCATT CACCGTA    |
| Id4 qPCR reverse  | AAGGTTGGATT CACGATTGC     |
| Tbp qPCR forward  | CTTCGTGCAAGAAATGCTGAAT    |
| Tbp qPCR reverse  | CAGTTGTCCGTGGCTCTCTTATT   |
| Zeb2 forward      | GAGCAGGTAACCGCAAGTTCAAGTG |
| Zeb2 reverse      | CTGTAGGACCCAGAATGAGAGAAGC |
| Zeb2 qPCR forward | GGCAAGGCCTTCAAGTACAA      |
| Zeb2 qPCR reverse | AAGCGTTTCTTGCAGTTTGG      |

| Primer - ChIP | sequence              |
|---------------|-----------------------|
| mId1_E1_For   | ATAAGAGGAGGTGTCATGT   |
| mId1_E1_Rev   | CACCAAGCAAAGGCACT     |
| mId1_E4_For   | CTAAGTCTGCAGGTGACG    |
| mId1_E4_Rev   | GTCACCCATTCATAAAACCC  |
| mAmylase_For  | CTCCTTGTACGGGTTGGT    |
| mAmylase_Rev  | AATGATGTGCACAGCTGAA   |
| S1/5_1_For    | GGTTTTATGAATGGGTGACG  |
| S1/5_1_Rev    | CCCCCTCCCTTTCCTTT     |
| S1/5_2_For    | TACATAGCAAGTCCGAGTC   |
| S1/5_2_Rev    | AGATTGGGCTGTGATCTCTA  |
| S1/5_3_For    | TACTAGTAGATCCAGAGGTGG |
| S1/5_3_Rev    | AAGGTTGTACAATGAGAGGG  |

**Table S2 – antibodies used in this study**

| <b>Antigen</b>    | <b>Source</b> | <b>Manufacturer</b> | <b># Catalog</b> | <b>Dilution</b> |
|-------------------|---------------|---------------------|------------------|-----------------|
| Bhlhe22           | Goat          | Santa Cruz          | sc-6045          | 1:500           |
| Crx               | Mouse         | Abnova              | #H00001406-M02   | 1:400           |
| Cleaved caspase 3 | Rabbit        | Cell Signaling      | 9664             | 1:400           |
| Hes1              | Rabbit        | Cell Signaling      | 11988            | 1:300           |
| Isl1              | Mouse         | DSHB                | 40.2D6           | 1:100           |
| Ki67              | Mouse         | BD Biosciences      | 550609           | 1:100           |
| Lhx2              | Goat          | Santa Cruz          | Sc-19344         | 1:50            |
| Nf165             | Mouse         | Hybridoma Bank      | AB 2314897       | 1:500           |
| P27Kip1           | Rabbit        | Thermo Fisher       | PA516717         | 1:100           |
| Sox9              | Rabbit        | Chemicon            | Ab5535           | 1:200           |
| Pax6              | Rabbit        | biolegend           | 901301           | 1:100           |
| Vsx2              | Sheep         | exalpha             | X1180P           | 1:1000          |
| Zeb2              | Rabbit        | Santa Cruz          | sc-48789         | 1:100           |
| b-tubulin         | Mouse         | Cell signaling      | 86298            | 1:1000          |
| GAPDH             | Rabbit        | Cell signaling      | 2118             | 1:1000          |
